# Supplementary material for: Safety and Efficacy of Ceftolozane/Tazobactam Plus Metronidazole Versus Meropenem From a Phase 2, Randomized Clinical Trial in Pediatric Participants With Complicated Intra-abdominal Infection
Source: PubMed Central journal article supplement — Pediatr Infect Dis J. 2023 Mar 29;42(7):557–63. doi: 10.1097/INF.0000000000003911 (PMC10259210; doi:10.1097/inf.0000000000003911), 2023-03-29
Supplement: inf-42-557-s002.pdf [file inf-42-557-s002.pdf]

# Safety and Efficacy of Ceftolozane/Tazobactam Plus Metronidazole Versus Meropenem From a Phase 2, Randomized Clinical Trial in Pediatric Participants With Complicated Intra-abdominal Infection

**Authors:** Carl-Christian A. Jackson, MD, Jason Newland, MD, MEd, Nataliia Dementieva, MD, Julia Lonchar, MSc, Feng-Hsiu Su, MPH, MBA, Jennifer A. Huntington, PharmD, Mekki Bensaci, PhD, Myra W. Popejoy, PharmD, Matthew G. Johnson, MD, Carisa De Anda, PharmD, Elizabeth G. Rhee, MD, Christopher J. Bruno, MD

## Supplemental Digital Content 2

### Study Disposition of All Randomized Participants

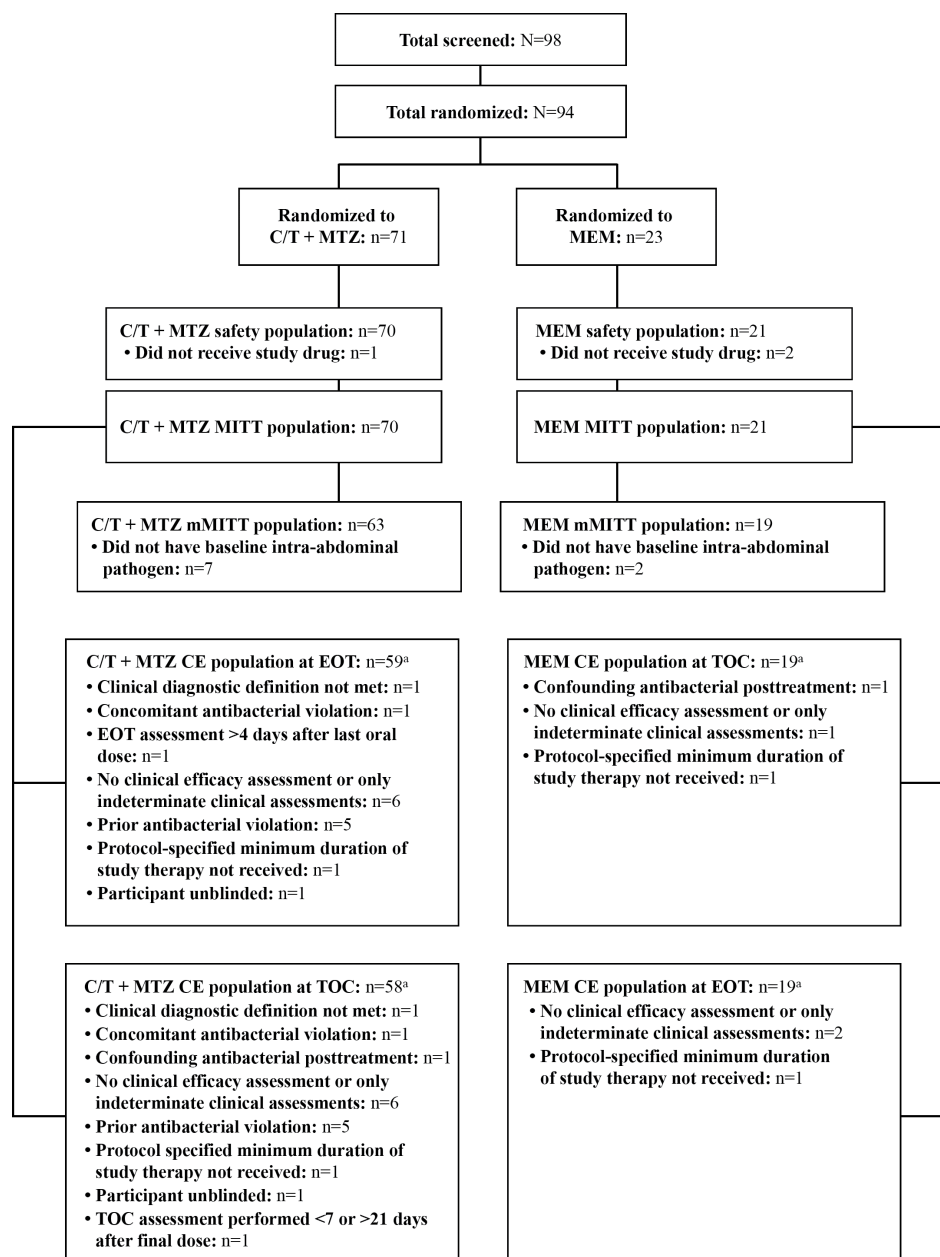

CE, clinically evaluable; C/T, ceftolozane/tazobactam; EOT, end of treatment; MEM, meropenem; MITT, modified intent-to-treat; mMITT, microbiologic modified intent-to-treat; TOC, test of cure; MTZ, metronidazole.

<sup>a</sup>Reasons for exclusion were not mutually exclusive.
