# Supplementary material for: Safety and Efficacy of Ceftolozane/Tazobactam Plus Metronidazole Versus Meropenem From a Phase 2, Randomized Clinical Trial in Pediatric Participants With Complicated Intra-abdominal Infection
Source: PubMed Central journal article supplement — Pediatr Infect Dis J. 2023 Mar 29;42(7):557–63. doi: 10.1097/INF.0000000000003911 (PMC10259210; doi:10.1097/inf.0000000000003911), 2023-03-29
Supplement: inf-42-557-s003.pdf [file inf-42-557-s003.pdf]

**Safety and Efficacy of Ceftolozane/Tazobactam Plus Metronidazole Versus Meropenem From a Phase 2, Randomized Clinical Trial in Pediatric Participants With Complicated Intra-abdominal Infection**

**Authors:** Carl-Christian A. Jackson, MD, Jason Newland, MD, MEd, Nataliia Dementieva, MD, Julia Lonchar, MSc, Feng-Hsiu Su, MPH, MBA, Jennifer A. Huntington, PharmD, Mekki Bensaci, PhD, Myra W. Popejoy, PharmD, Matthew G. Johnson, MD, Carisa De Anda, PharmD, Elizabeth G. Rhee, MD, Christopher J. Bruno, MD

**Supplemental Digital Content 3**

**Subgroup Analyses of Participants Achieving Clinical Cure Response at the TOC Visit (MITT Population)**

| <b>Clinical cure by subgroup, n/N1 (%)</b> | <b>C/T + MTZ (N=70)</b> | <b>MEM + placebo (N=21)</b> |
|--------------------------------------------|-------------------------|-----------------------------|
| <b>Sex</b>                                 |                         |                             |
| Male                                       | 39/47 (83.0)            | 6/6 (100.0)                 |
| Female                                     | 17/23 (73.9)            | 15/15 (100.0)               |
| <b>Region</b>                              |                         |                             |
| North America                              | 20/26 (76.9)            | 7/7 (100.0)                 |
| Europe                                     | 33/37 (89.2)            | 13/13 (100.0)               |
| South America                              | 0/1 (0)                 | –                           |
| Africa                                     | 2/4 (50.0)              | –                           |
| Asia/Pacific                               | 1/2 (50.0)              | 1/1 (100.0)                 |
| <b>Duration of IV study treatment</b>      |                         |                             |
| <7 days                                    | 33/43 (76.7)            | 16/16 (100.0)               |
| ≥7 days                                    | 23/27 (85.2)            | 5/5 (100.0)                 |
| <b>Number of abscesses</b>                 |                         |                             |
| Single                                     | 16/20 (80.0)            | 5/5 (100.0)                 |
| Multiple                                   | 40/50 (80.0)            | 16/16 (100.0)               |
| <b>Peritonitis type</b>                    |                         |                             |
| Local                                      | 13/18 (72.2)            | 9/9 (100.0)                 |
| Diffuse                                    | 24/27 (88.9)            | 6/6 (100.0)                 |
| Missing                                    | 19/25 (76.0)            | 6/6 (100.0)                 |
| <b>Procedure type</b>                      |                         |                             |
| Percutaneous                               | 2/2 (100.0)             | 0                           |
| Laparoscopic                               | 36/44 (81.8)            | 11/11 (100.0)               |
| Open                                       | 16/20 (80.0)            | 9/9 (100.0)                 |
| Other                                      | 2/3 (66.7)              | 1/1 (100.0)                 |
| Missing                                    | 0/1 (0)                 | 0                           |

|                               |              |               |
|-------------------------------|--------------|---------------|
| Prior antibacterial agent use |              |               |
| Yes                           | 53/67 (79.1) | 21/21 (100.0) |
| No                            | 3/3 (100.0)  | 0             |
| Site of infection             |              |               |
| Appendix                      | 52/64 (81.3) | 21/21 (100.0) |
| Nonappendix                   | 4/6 (66.7)   | 0             |
| Bacteremia at baseline        |              |               |
| Yes                           | 2/2 (100.0)  | 0             |
| No                            | 54/68 (79.4) | 21/21 (100.0) |
| Number of baseline pathogens  |              |               |
| Polymicrobial                 | 31/38 (81.6) | 14/14 (100.0) |
| Monomicrobial                 | 22/26 (84.6) | 5/5 (100.0)   |
| Missing                       | 3/6 (50.0)   | 2/2 (100.0)   |

---

C/T, ceftolozane/tazobactam; IV, intravenous; MEM, meropenem; MITT, modified intent-to-treat; MTZ, metronidazole; TOC, test of cure.

N1=Number of participants in the specific subgroup. Percentages were calculated as  $100 \times (n/N1)$ .
